# Supplementary material
Source: PubMed Central journal article supplement (PMC4224962)
Supplement: NIHMS632956-supplement-Supplementary_Information.pdf [file NIHMS632956-supplement-Supplementary_Information.pdf]

Supplementary Information | All metabolic and clinical data for the cancer patients included in this study.

| Patient no | Height (cm) | Weight (kg) | Age | LBM (kg) | Fat Mass (kg) | VO2 (L/min) | VCO2 (L/min) | RQ   | Measured REE (Kcal/day) | Measured REE (kcal/day/LBM) | Dietary Intake (Kcal) | PTHrP (pg/ml) | CRP (mg/L) |
|------------|-------------|-------------|-----|----------|---------------|-------------|--------------|------|-------------------------|-----------------------------|-----------------------|---------------|------------|
| 1          | 192         | 94.1        | 66  | 50.849   | 27.042        | 0.233       | 0.168        | 0.72 | 1588                    | 31.2                        | 3043.4                | 516.9         | 4.2        |
| 2          | 170         | 71.4        | 67  | 32.703   | 32.342        | 0.197       | 0.145        | 0.73 | 1348                    | 41.2                        | 1924.3                | 472.5         | 16.5       |
| 3          | 164         | 53.8        | 67  | 37.029   | 11.398        | 0.171       | 0.132        | 0.77 | 1182                    | 31.9                        | 1803.8                | 372.3         | 7.5        |
| 4          | 169         | 75.8        | 49  | 39.265   | 31.718        | 0.216       | 0.182        | 0.84 | 1515                    | 38.6                        | 1194.0                | 366.6         | 8.2        |
| 5          | 164         | 69.7        | 74  | 33.338   | 29.658        | 0.187       | 0.127        | 0.68 | 1219                    | 36.6                        | 1942.5                | 322.4         | 2.9        |
| 6          | 155         | 59.1        | 60  | 29.339   | 25.16         | 0.16        | 0.134        | 0.84 | 1119                    | 38.1                        | 2655.1                | 245.0         | 2.1        |
| 7          | 174         | 67.6        | 64  | 50.901   | 13.491        | 0.203       | 0.163        | 0.8  | 1414                    | 27.8                        | 2522.4                | 220.4         | 2.4        |
| 8          | 163         | 72.4        | 69  | 34.938   | 33.546        | 0.187       | 0.13         | 0.7  | 1222                    | 35.0                        | 1219.5                | 180.6         | 5.3        |
| 9          | 163         | 72.6        | 68  | 31.271   | 34.404        | 0.193       | 0.131        | 0.68 | 1258                    | 40.2                        | 1446.6                | 162.4         | 5.2        |
| 10         | 160         | 52.5        | 38  | 33.089   | 15.038        | 0.215       | 0.197        | 0.92 | 1536                    | 46.4                        | 2905.2                | 148.1         | 2.2        |
| 11         | 177         | 75.2        | 72  | 51.276   | 18.157        | 0.204       | 0.153        | 0.75 | 1401                    | 27.3                        | 3415.7                | 147.4         | 2.9        |
| 12         | 159         | 55.7        | 39  | 33.793   | 17.353        | 0.22        | 0.182        | 0.83 | 1536                    | 45.5                        | 2776.6                | 110.3         | 1          |
| 13         | 161         | 78.9        | 65  | 42.666   | 30.499        | 0.232       | 0.15         | 0.65 | 1510                    | 35.4                        | 2251.7                | 80.8          | 15.6       |
| 14         | 160         | 57.3        | 65  | 34.81    | 17.52         | 0.148       | 0.116        | 0.79 | 1022                    | 29.4                        | 1917.2                | 65.3          | 1.3        |
| 15         | 162         | 114.5       | 61  |          |               | 0.269       | 0.198        | 0.74 | 1841                    | 38.6                        | 2652.3                | 43.8          | 7.8        |
| 16         | 167         | 142.2       | 41  |          |               | 0.309       | 0.237        | 0.77 | 2130                    |                             | 3870.3                | 33.2          | 1.8        |
| 17         | 186         | 90.5        | 60  | 56.48    | 25.144        | 0.259       | 0.201        | 0.78 | 1791                    | 31.7                        | 2652.6                | 11.6          | 10.4       |
| 18         | 179         | 105.3       | 77  | 66.261   | 33.693        | 0.238       | 0.206        | 0.86 | 1678                    | 25.3                        | 2334.2                | 0             | 5.9        |
| 19         | 166         | 64.2        | 59  | 36.379   | 22.263        | 0.178       | 0.146        | 0.82 | 1240                    | 34.1                        | 2641.2                | 0             | 16.6       |
| 20         | 179         | 98.1        | 64  | 63.062   | 30.362        | 0.227       | 0.172        | 0.76 | 1559                    | 24.7                        | 1987.7                | 0             | 4.4        |
| 21         | 177         | 97.3        | 52  | 59.531   | 31.724        | 0.306       | 0.214        | 0.7  | 2002                    | 33.6                        | 1713.7                | 0             | 4.4        |
| 22         | 177         | 97.3        | 52  | 61.816   | 32.052        | 0.315       | 0.22         | 0.7  | 2064                    | 33.4                        | 1990.0                | 0             | 3.2        |
| 23         | 182         | 80.7        | 36  | 50.717   | 24.287        | 0.269       | 0.239        | 0.89 | 1910                    | 37.7                        | 2965.4                | 0             | 6.1        |
| 24         | 175         | 92.8        | 56  | 51.99    | 33.69         | 0.25        | 0.186        | 0.74 | 1713                    | 32.9                        | 2715.8                | 0             | 11.5       |
| 25         | 184         | 108.4       | 52  | 63.78    | 37.311        | 0.309       | 0.21         | 0.68 | 2019                    | 31.7                        | 3101.4                | 0             | 2.3        |
| 26         | 161         | 72.0        | 51  | 37.321   | 28.942        | 0.206       | 0.152        | 0.74 | 1413                    | 37.9                        | 2473.7                | 0             | 7.8        |
| 27         | 178         | 66.9        | 71  | 55.47    | 8.938         | 0.227       | 0.159        | 0.7  | 1489                    | 26.8                        | 1664.0                | 0             | 3.9        |
| 28         | 164         | 48.1        | 64  | 32.982   | 12.69         | 0.16        | 0.122        | 0.76 | 1104                    | 33.5                        | 2056.4                | 0             | 1.1        |
| 29         | 156.7       | 81.6        | 58  | 38.496   | 39.853        | 0.201       | 0.143        | 0.71 | 1367                    | 35.5                        | 1995.5                | 0             | 18.3       |
| 30         | 167         | 64.7        | 77  | 43.153   | 17.875        | 0.179       | 0.134        | 0.75 | 1229                    | 28.5                        | 2352.2                | 0             |            |
| 31         | 174         | 86.7        | 73  | 54.741   | 24.912        | 0.247       | 0.199        | 0.81 | 1720                    | 31.4                        | 3023.2                | 0             | 1          |
| 32         | 173         | 87.5        | 73  | 55.51    | 25.097        | 0.234       | 0.184        | 0.79 | 1619                    | 29.2                        | 2950.7                | 0             | 1.8        |
| 33         | 171         | 66.4        | 50  | 37.99    | 23.06         | 0.208       | 0.139        | 0.67 | 1356                    | 35.7                        | 1860.4                | 0             | 1          |
| 34         | 155         | 60.0        | 60  | 32.857   | 24.651        | 0.169       | 0.138        | 0.81 | 1180                    | 35.9                        | 2655.1                | 0             | 2.1        |
| 35         | 188         | 86.1        | 50  | 54.227   | 24.947        | 0.257       | 0.192        | 0.75 | 1765                    | 32.5                        | 2407.9                | 0             | 16.7       |
| 36         | 174         | 76.1        | 49  | 39.757   | 29.075        | 0.203       | 0.16         | 0.79 | 1406                    | 35.4                        | 1952.0                | 0             | 21         |
| 37         | 174         | 77.8        | 49  | 43.177   | 31.252        | 0.208       | 0.154        | 0.74 | 1424                    | 33.0                        | 2737.2                | 0             | 22         |
| 38         | 183         | 91.6        | 79  | 55.289   | 28.793        | 0.218       | 0.17         | 0.78 | 1510                    | 27.3                        | 2731.8                | 0             | 1          |
| 39         | 176         | 114.5       | 74  | 63.067   | 44.106        | 0.293       | 0.23         | 0.79 | 2028                    | 32.2                        | 2269.0                | 0             | 6.6        |
| 40         | 176         | 116.8       | 74  | 66.525   | 41.926        | 0.315       | 0.248        | 0.79 | 2185                    | 32.8                        | 1888.5                | 0             | 11.5       |
| 41         | 172         | 72.6        | 61  | 38.9     | 29.84         | 0.208       | 0.169        | 0.81 | 1447                    | 37.2                        | 2697.9                | 0             | 3.4        |
| 42         | 160         | 57.0        | 66  | 40.289   | 12.071        | 0.162       | 0.134        | 0.83 | 1133                    | 28.1                        | 1197.7                | 0             | 1          |
| 43         | 156         | 68.5        | 70  | 33.806   | 31.484        | 0.155       | 0.128        | 0.83 | 1086                    | 32.1                        | 2181.2                | 0             | 6.3        |
| 44         | 179         | 85.3        | 81  | 52.598   | 26.066        |             |              |      |                         |                             | 2237.9                | 0             | 8.1        |
| 45         | 179         | 62.9        | 58  | 42.578   | 14.593        | 0.269       | 0.182        | 0.68 | 1758                    | 41.3                        | 2545.1                | 0             | 153        |
| 46         | 162         | 70.7        | 65  | 41.909   | 23.511        |             |              |      |                         |                             | 1440.6                | 0             | 3.7        |
| 47         | 161         | 45.9        | 78  | 35.051   | 5.86          | 0.208       | 0.145        | 0.7  | 1360                    | 38.8                        | 1791.6                | 0             | 19.5       |
